# Supplementary material for: Comprehensive Structural and Molecular Comparison of Spike Proteins of SARS-CoV-2, SARS-CoV and MERS-CoV, and Their Interactions with ACE2
Source: PubMed Central journal article supplement (PMC7763676; doi:10.3390/cells9122638), 2020-12-08
Supplement: cells-09-02638-s001.pdf [file cells-09-02638-s001.pdf]

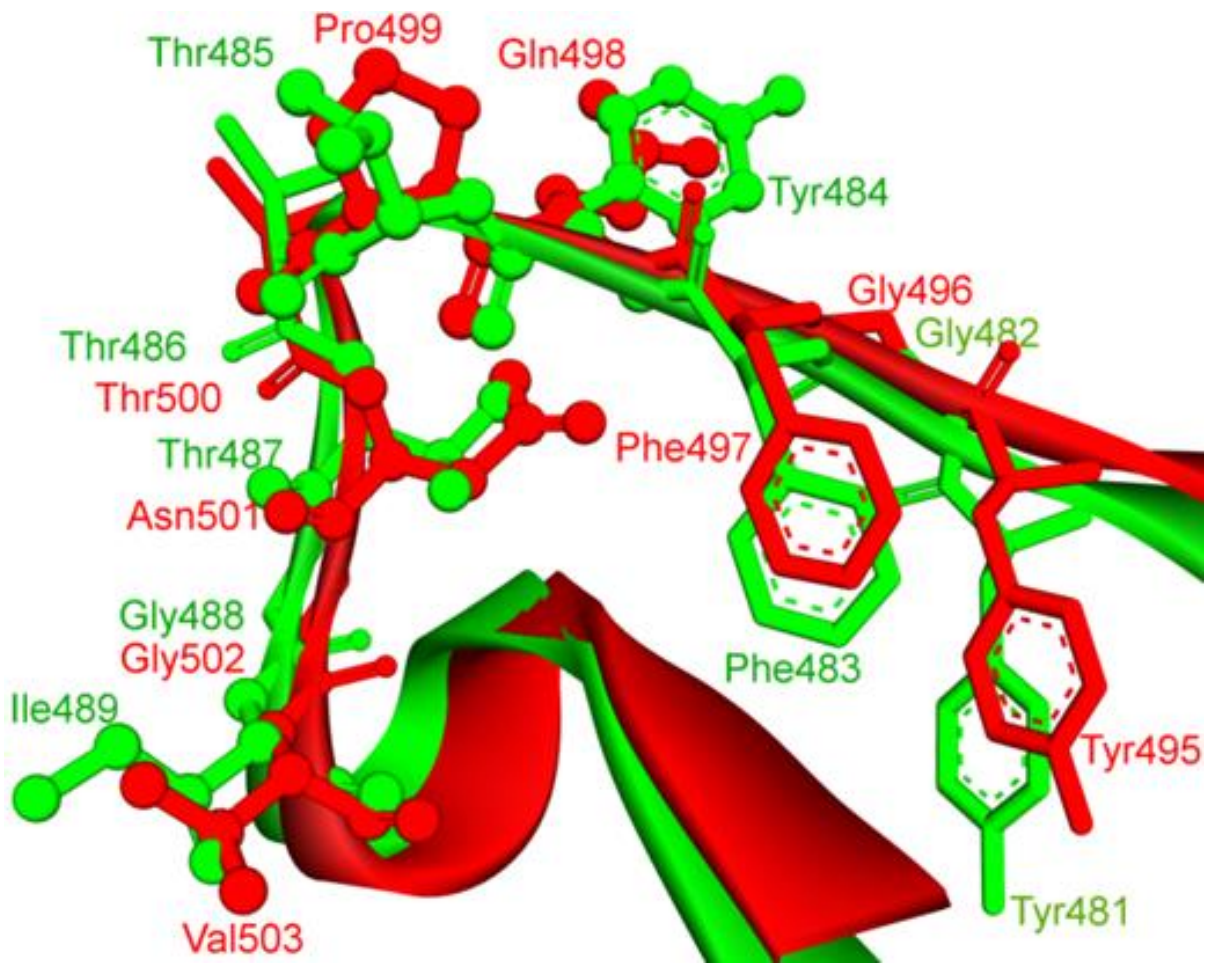

**Figure S1.** Structural alignment of TR2 for both SARS-CoV (green) and SARS-CoV-2 (red); the annotated amino acids represent those that differ between the two viruses. Created using Discovery Studio (version 2.5.5, Biovia, USA).

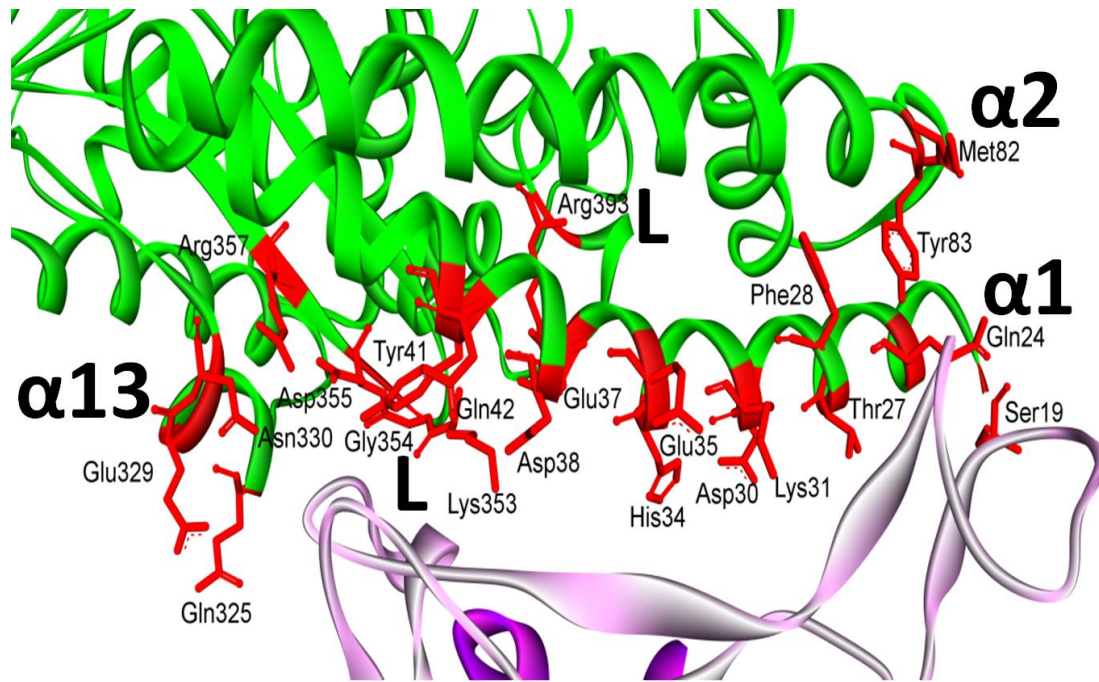

**Figure S2.** The main contacting residues from ACE2 with RBM region. Created using Discovery Studio (version 2.5.5, Biovia, USA).
